# Supplementary material for: Self-supported fabrication and electrochemical water splitting study of transition-metal sulphide nanostructured electrodes
Source: Royal Society of Chemistry journal article supplement (doi:10.1039/d0nj00192a), 2020-01-01
Supplement: d0nj00192a1.pdf [file d0nj00192a1.pdf]

**Supporting Information**

**Self-Supported Fabrication and Electrochemical Water Splitting Study  
of Transition-Metal Sulphides Nanostructured Electrodes**

Ayyavu Shankar, Rajasekaran Elakkiya, and Govindhan Maduraiveeran\*

Materials Electrochemistry Laboratory, Department of Chemistry, SRM Institute of Science and  
Technology, Kattankulathur, Tamil Nadu-603 203, India.

*\*Corresponding Author E-mail: [maduraig@srmist.edu.in](mailto:maduraig@srmist.edu.in)*

**Table S1.** Equivalent circuit parameters obtained by fitting of EIS experimental data from **Fig. 7**.

| <b>Electrodes</b> | <b><math>E_{\text{app}}</math> / V</b> | <b><math>R_s</math> [<math>\Omega</math> cm<sup>2</sup>]</b> | <b><math>R_p</math> [<math>\Omega</math> cm<sup>2</sup>]</b> | <b><math>Q</math> [mF cm<sup>2</sup>]</b> |
|-------------------|----------------------------------------|--------------------------------------------------------------|--------------------------------------------------------------|-------------------------------------------|
| FeS               | 1.59                                   | 6.31                                                         | 3.53                                                         | 8.6                                       |
|                   | 1.65                                   | 6.32                                                         | 2.13                                                         | 11.9                                      |
|                   | 1.69                                   | 6.38                                                         | 1.42                                                         | 9.1                                       |
| CoS               | 1.59                                   | 5.64                                                         | 11.63                                                        | 11.6                                      |
|                   | 1.65                                   | 5.66                                                         | 4.32                                                         | 12.5                                      |
|                   | 1.69                                   | 5.65                                                         | 2.72                                                         | 15.6                                      |
| NiS               | 1.59                                   | 5.62                                                         | 8.49                                                         | 16.3                                      |
|                   | 1.65                                   | 5.58                                                         | 4.08                                                         | 18.2                                      |
|                   | 1.69                                   | 5.59                                                         | 3.06                                                         | 23.6                                      |
| CuS               | 1.59                                   | 5.46                                                         | 14.3                                                         | 6.9                                       |
|                   | 1.65                                   | 5.43                                                         | 6.04                                                         | 7.9                                       |
|                   | 1.69                                   | 5.42                                                         | 4.44                                                         | 10.5                                      |

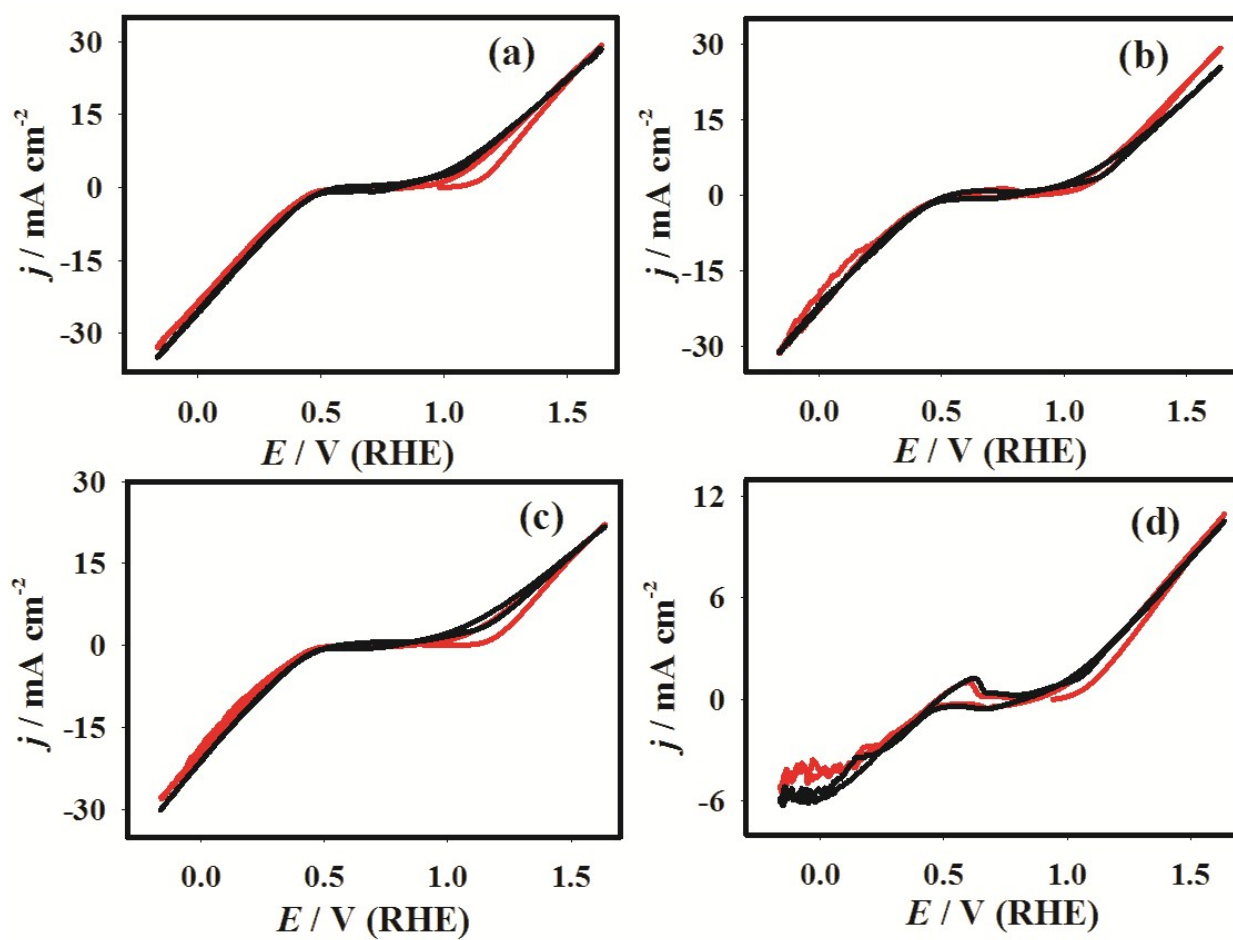

**Fig. S1.** CV curves of the NiF electrodes recorded for 5.0 mM Fe salt precursor (a), Co salt (b), Ni salt (c) and Cu salt (d) precursors in 0.75 M thiourea + 0.1 M nitric acid at a scan rate of 5 mV s<sup>-1</sup>.

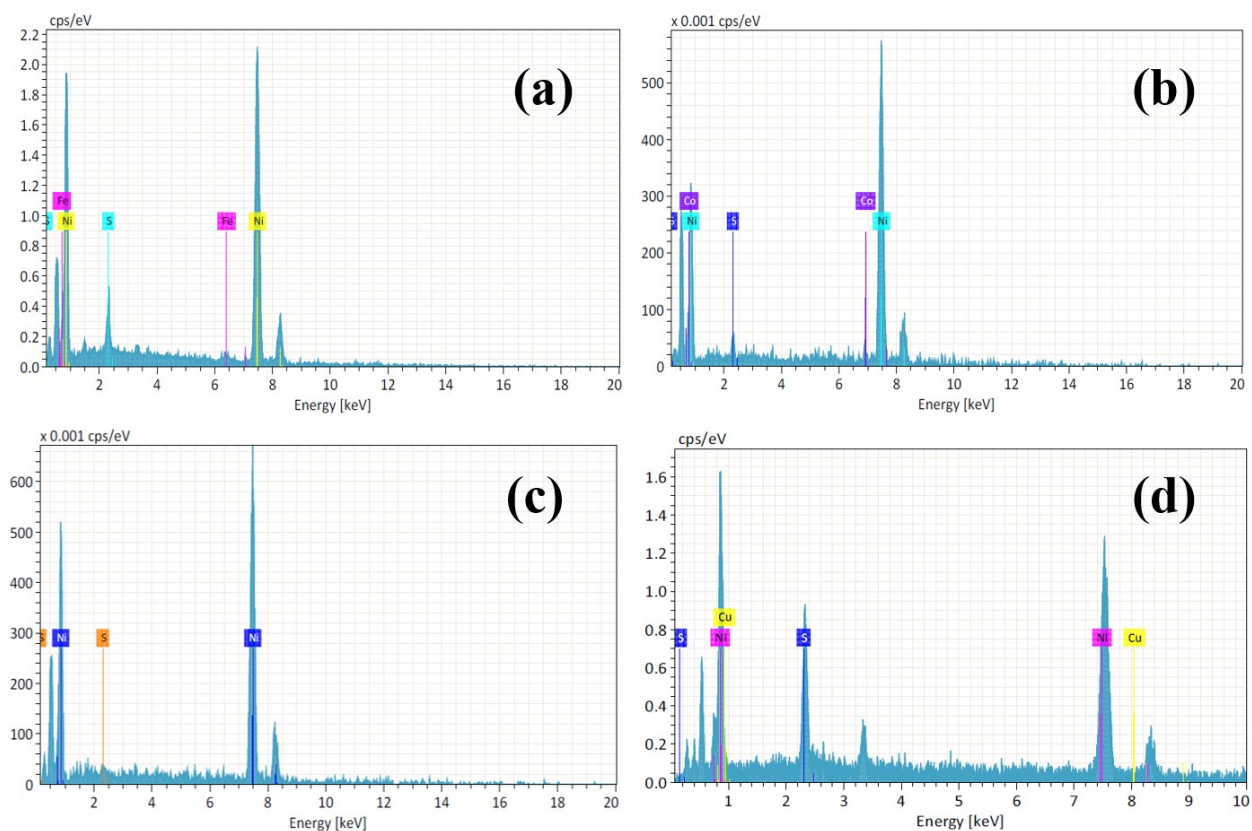

**Fig. S2.** Obtained EDX spectrum of a) FeS, b) CoS, c) NiS and d) CuS electrodes.

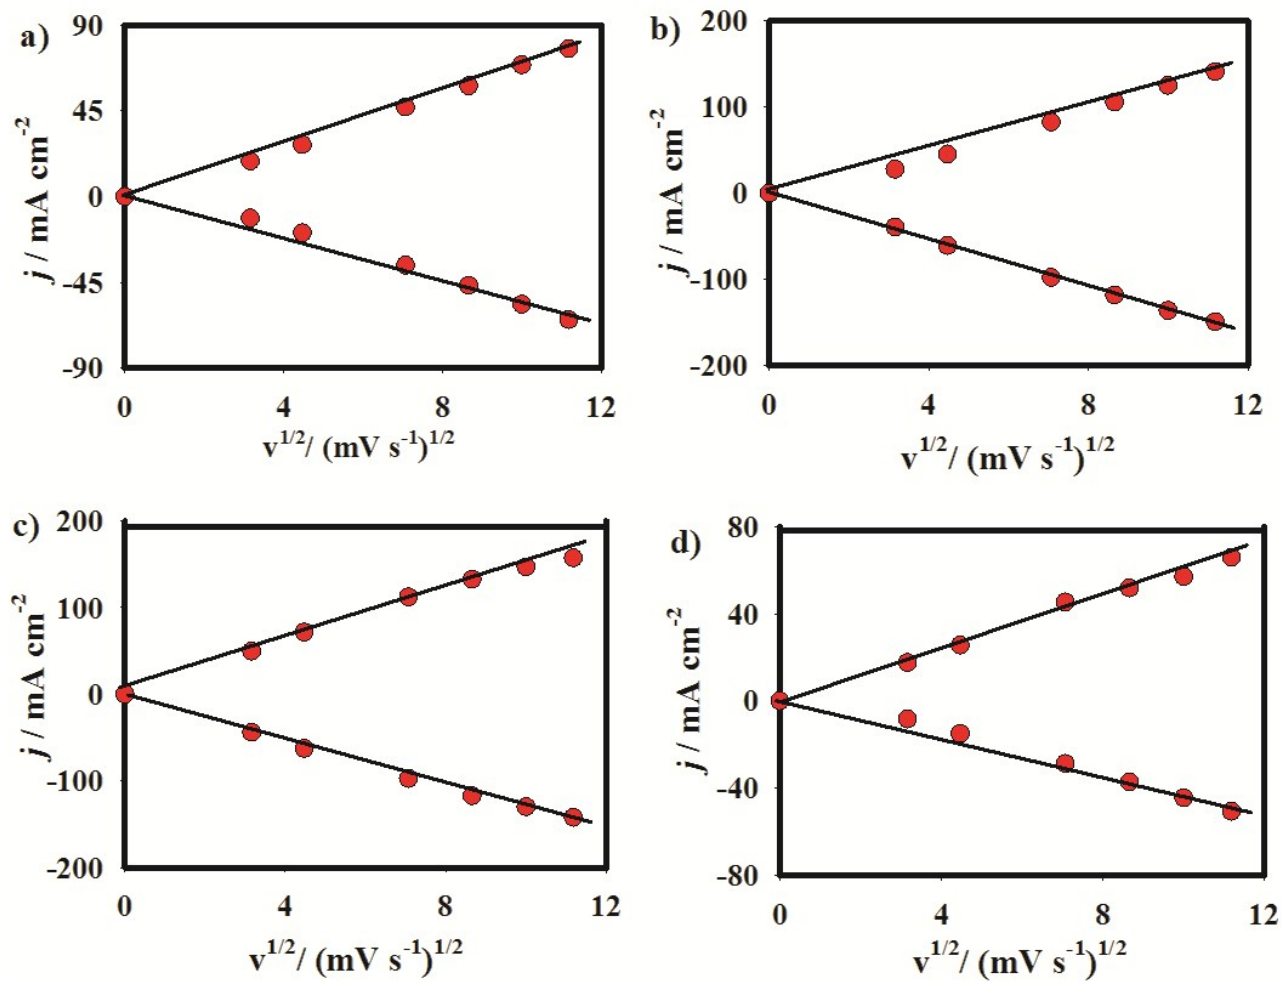

**Fig. S3.** Anodic and cathodic peak current densities of the a) FeS, b) CoS, c) NiS and d) CuS was obtained from the CV curves and plotted as a function of aquare root of the scan rates.

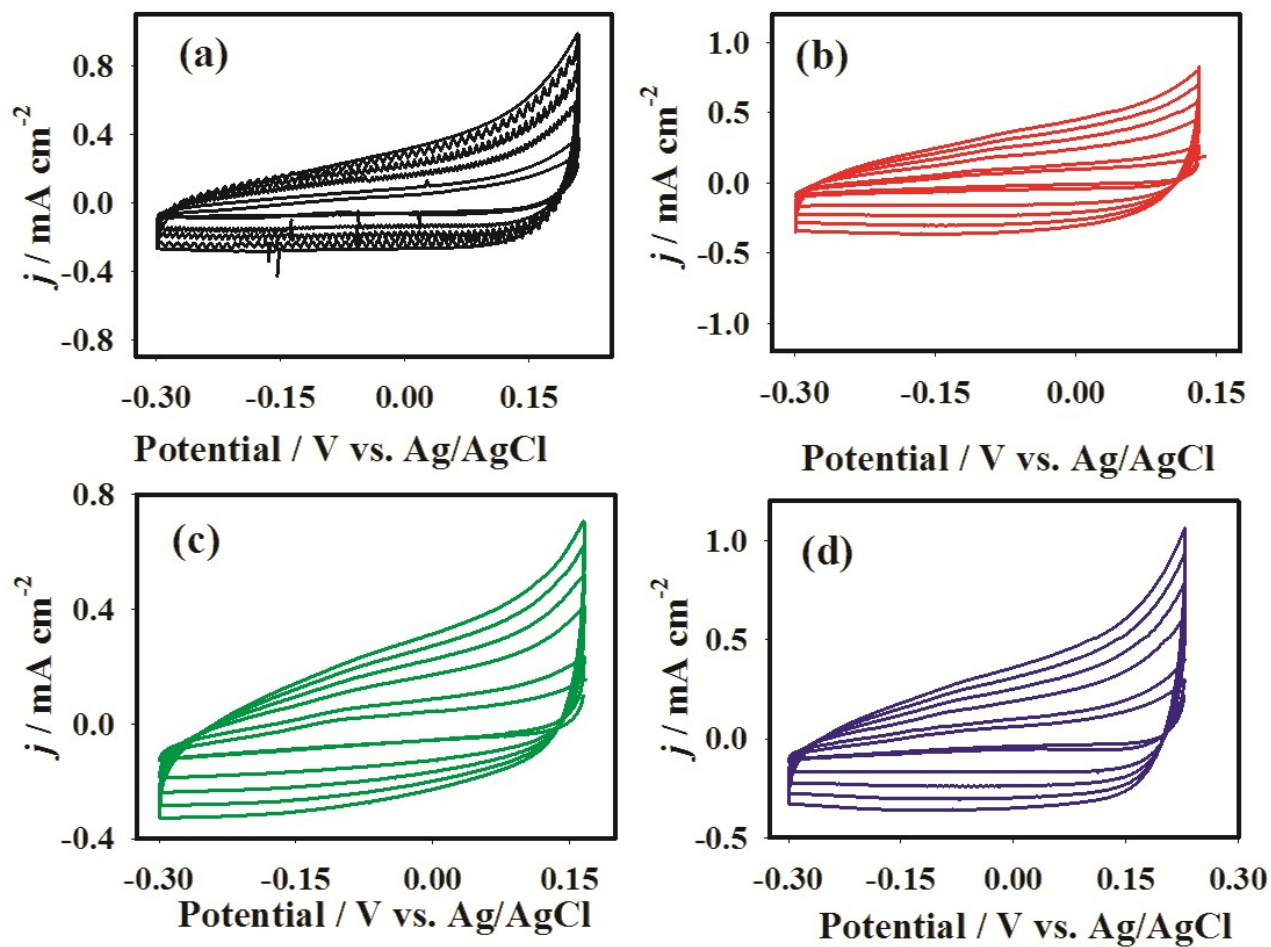

**Fig. S4.** ECSA for the a) FeS, b) CoS, c) NiS and d) CuS was measured by performing cyclic voltammograms in 1.0 M KOH solution at different scan rates from 10 to 125  $\text{mV s}^{-1}$ .

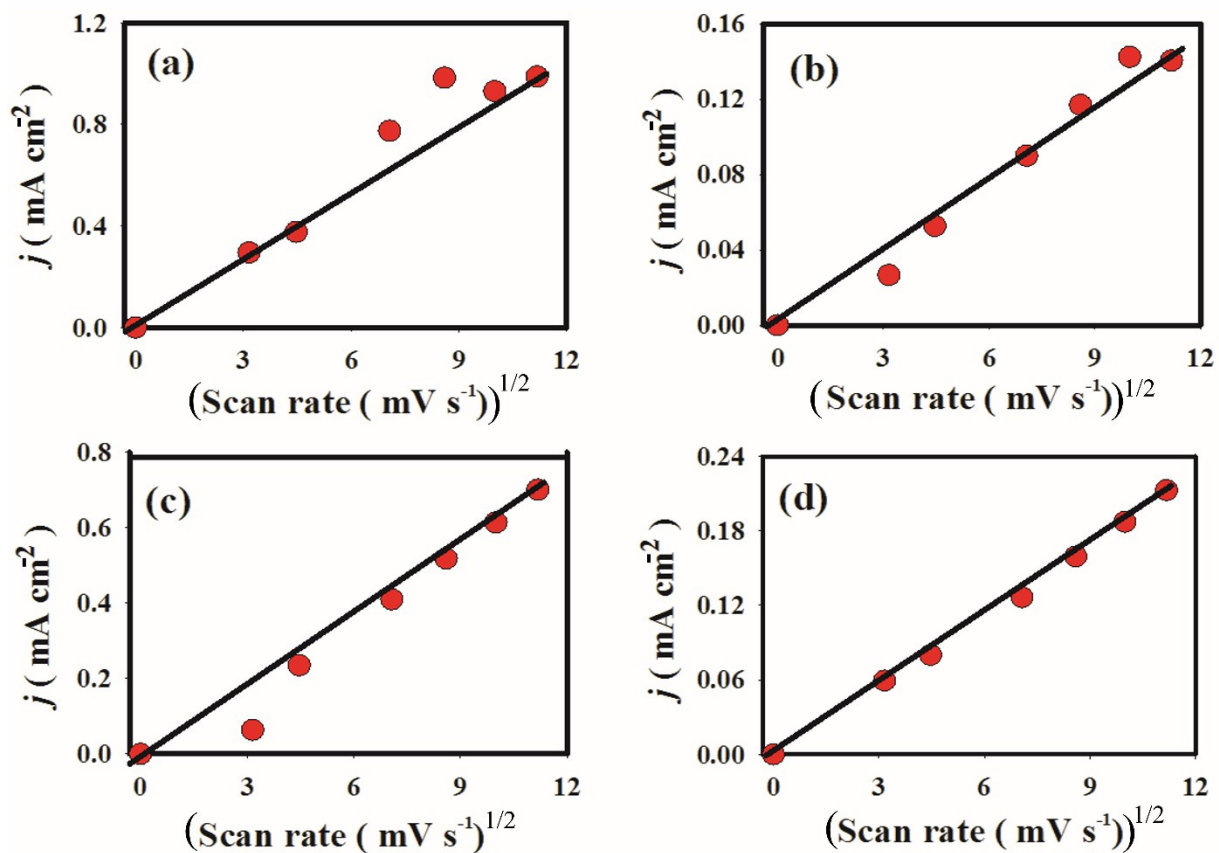

**Fig. S5.** CV curves measured in a non-faradaic region of the voltammogram and corresponding capacitive current at the specific potential as a function of scan rate of (a) FeS, (b) CoS, (c) NiS and (d) CuS electrodes.
